# Supplementary material for: A yolk–albumen–shell structure of mixed Ni–Co oxide with an ultrathin carbon shell for high-sensitivity glucose sensors
Source: Royal Society of Chemistry journal article supplement (doi:10.1039/d0ma00230e), 2020-01-01
Supplement: d0ma00230e1.pdf [file d0ma00230e1.pdf]

*Supplementary information for*

**Yolk-albumen-shell structure of mixed Ni-Co oxide with ultrathin carbon shell for high-sensitivity glucose sensors**

Xuan Zhang<sup>1,2</sup>, Yawei Zhang<sup>1</sup>, Maowen Xu<sup>1\*</sup>, Wei Guo<sup>2</sup>, Kai Wan<sup>2</sup>, Ting Zhang<sup>3</sup>, Jordi Arbiol<sup>3,4\*</sup>, Yong-Qing Zhao<sup>5</sup>, Cai-Ling Xu<sup>5</sup>, Jan Fransaer<sup>2\*</sup>

<sup>1</sup> Department of Materials Engineering, KU Leuven, Leuven 3001, Belgium. E-mail: [jan.fransaer@kuleuven.be](mailto:jan.fransaer@kuleuven.be);

<sup>2</sup> Key Laboratory of Luminescent and Real-Time Analytical Chemistry (Southwest University), Ministry of Education, School of Materials and Energy, Southwest University, Chongqing 400715, PR China. E-mail: [xumaowen@swu.edu.cn](mailto:xumaowen@swu.edu.cn);

<sup>3</sup> Catalan Institute of Nanoscience and Nanotechnology (ICN2), CSIC and BIST, Campus UAB, Bellaterra, 08193 Barcelona, Catalonia, Spain. E-mail: [arbiol@icrea.cat](mailto:arbiol@icrea.cat)

<sup>4</sup> ICREA, Pg. Lluís Companys 23, 08010 Barcelona, Catalonia, Spain

<sup>5</sup> State Key Laboratory of Applied Organic Chemistry, Key Laboratory of Nonferrous Metal Chemistry and Resources Utilization of Gansu Province, Laboratory of Special Function Materials and Structure Design of the Ministry of Education, College of Chemistry and Chemical Engineering, Lanzhou University, Lanzhou, 730000, China

|                                                                                             |    |
|---------------------------------------------------------------------------------------------|----|
| <b>Supplementary Figures and Tables</b> .....                                               | 2  |
| Figure S1: XRD pattern of (a) NiNP@C and (b) CoNP@C .....                                   | 2  |
| Figure S2: SEM images of NiNP@C .....                                                       | 3  |
| Figure S3: SEM images of YASNiCo@C .....                                                    | 4  |
| Figure S4: SEM images of CoNP@C .....                                                       | 5  |
| Figure S5: EELS chemical composition mapping of NiNP@C .....                                | 6  |
| Figure S6: EELS chemical composition mapping of CoNP@C .....                                | 7  |
| Figure S7: Amperometric responses of carbon paper to the addition of 1 mM glucose.....      | 8  |
| Figure S8: The selectivity study of YASNiCo@C .....                                         | 9  |
| Table S1: Comparison of the sensitivity with other electrodes reported in literatures. .... | 10 |
| <b>References</b> .....                                                                     | 11 |

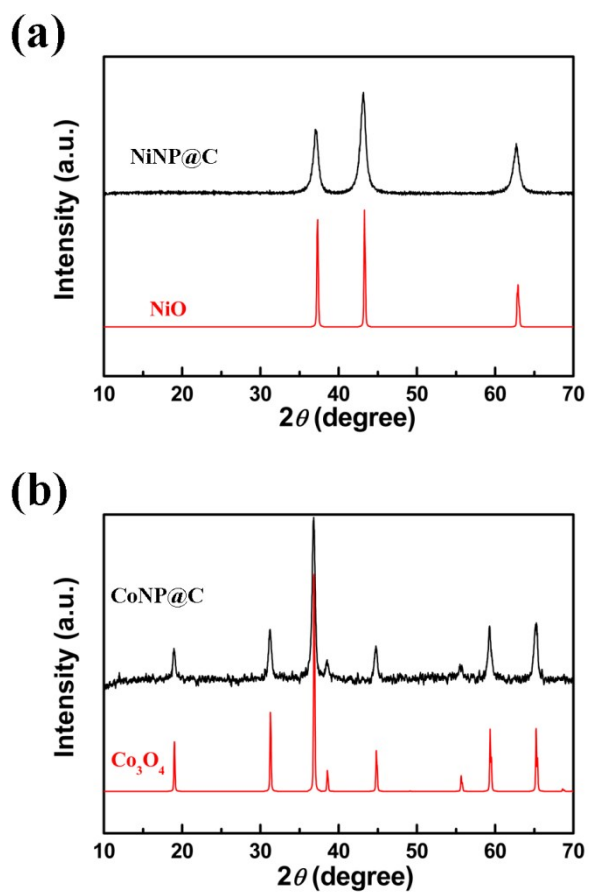

**Figure S1.** XRD pattern of (a) NiNP@C and (b) CoNP@C. (using Cu  $K_{\alpha}$  radiation with wave length  $\lambda = 0.15405$  nm and Ni filter with a step size of  $0.02^{\circ}$ )

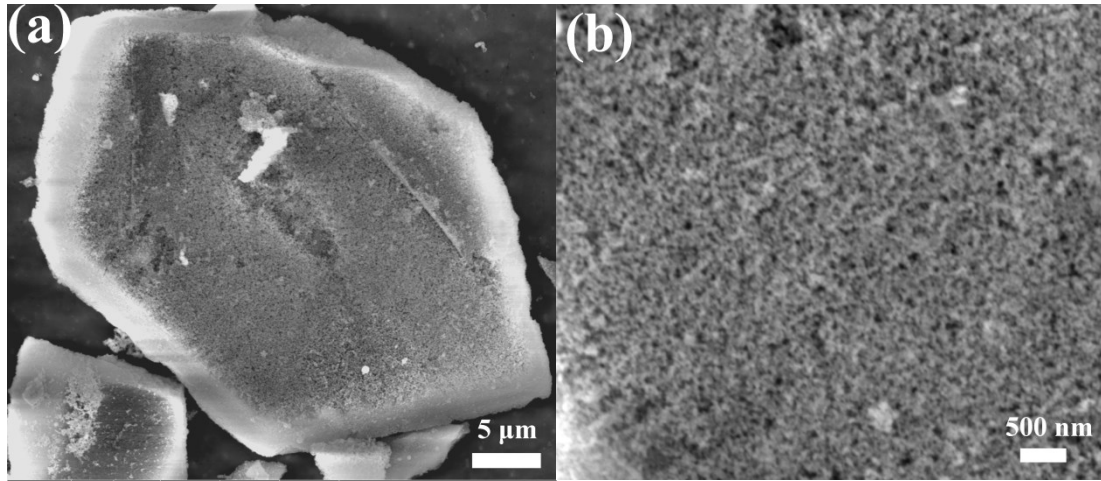

**Figure S2.** SEM images (at an acceleration voltage of 15 kV) of NiNP@C

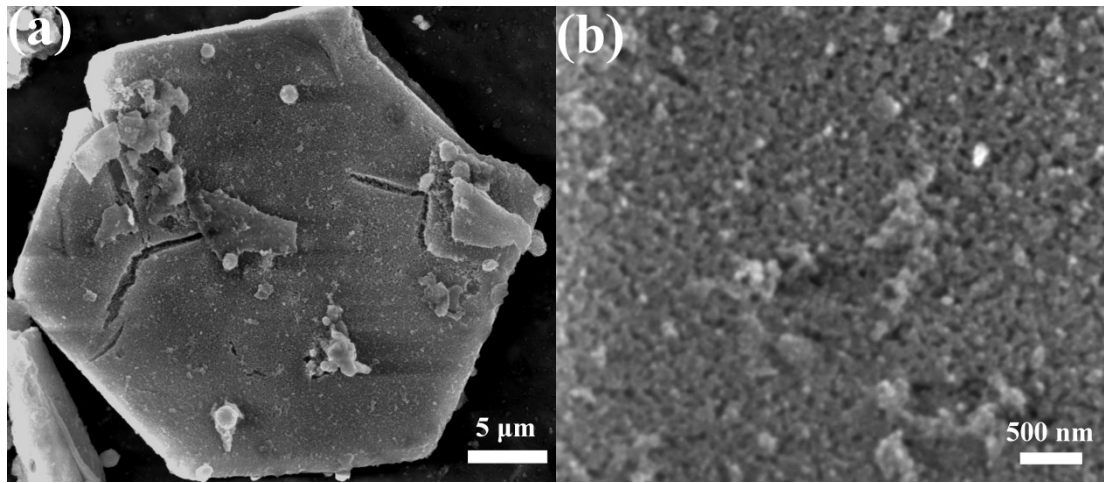

**Figure S3.** SEM images (at an acceleration voltage of 15 kV) of YASNiCo@C

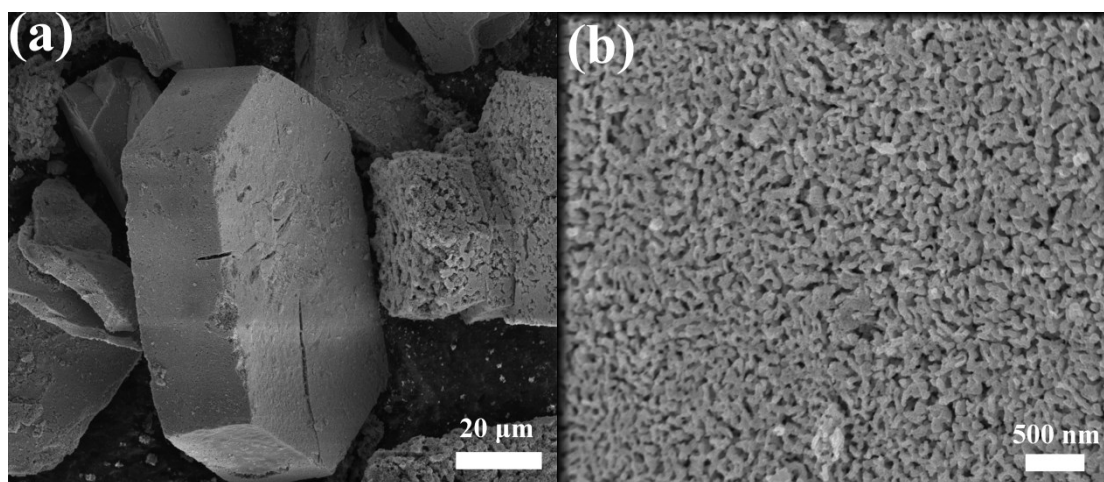

**Figure S4.** SEM images (at an acceleration voltage of 15 kV) of CoNP@C

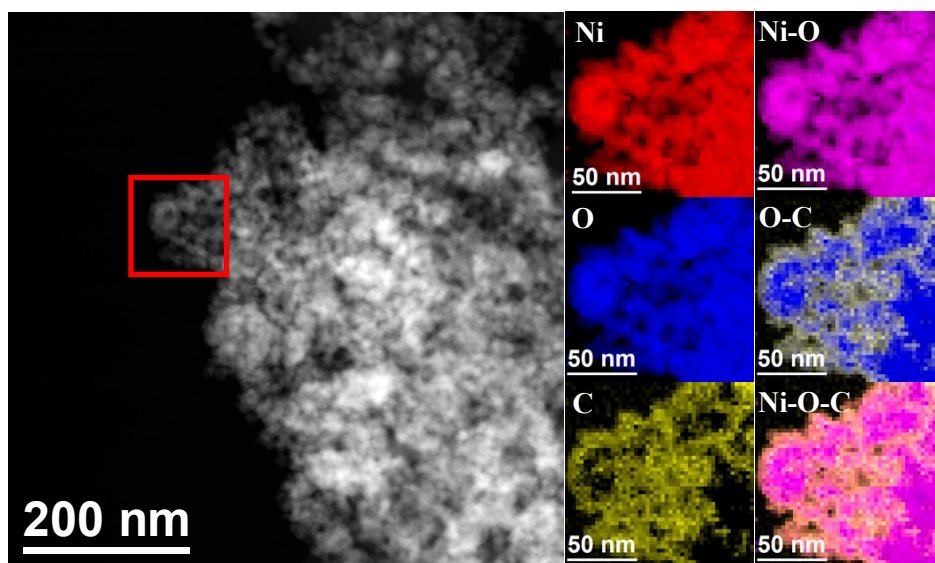

**Figure S5.** EELS chemical composition maps of NiNP@C from the area marked by the red square on the STEM micrograph. Individual Ni  $L_{2,3}$ -edges at 855 eV (red), O K-edge at 532 eV (blue) and C K-edge at 284 eV (yellow) as well as the composite (O-C and Ni-O-C) elemental maps.

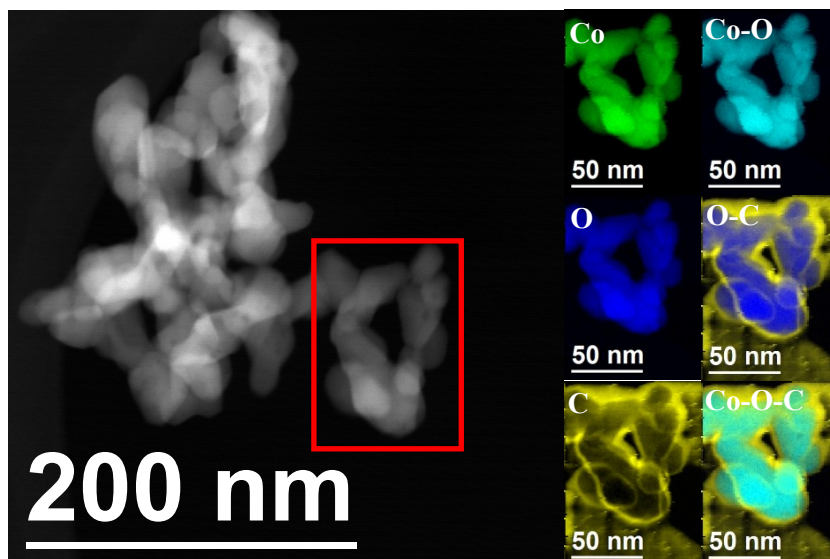

**Figure S6.** EELS chemical composition maps of CoNP@C from the area marked by the red square on the STEM micrograph. Individual Co  $L_{2,3}$ -edges at 779 eV (green), O K-edge at 532 eV (blue) and C K-edge at 284 eV (yellow) as well as the composite (O-C and Co-O-C) elemental map.

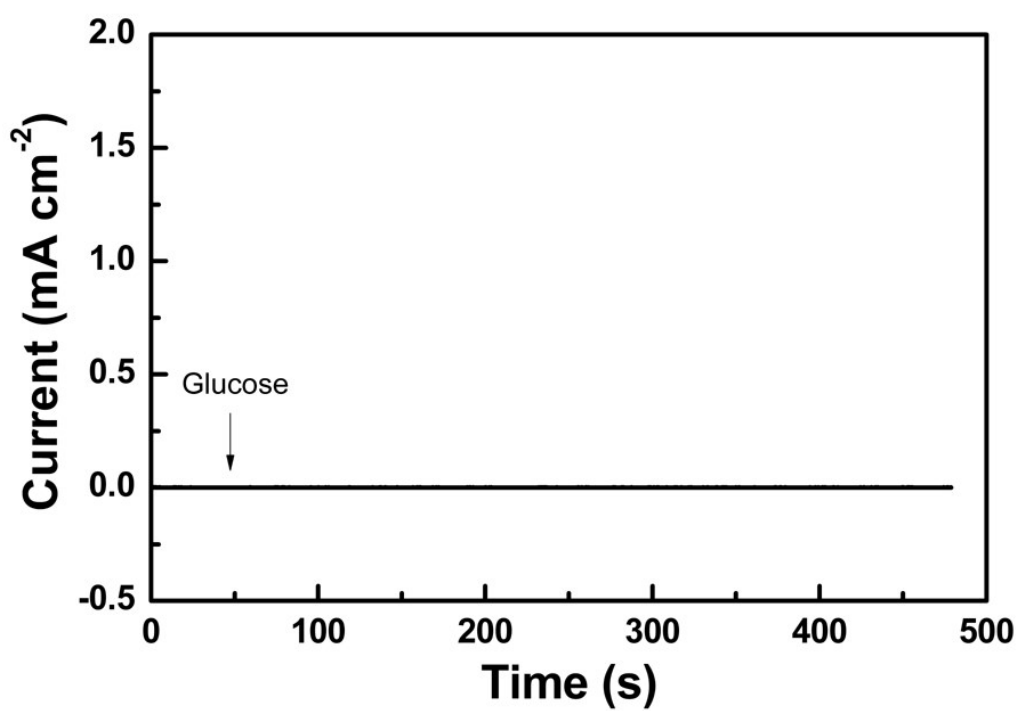

**Figure S7.** Amperometric response of carbon paper to the addition of 1 mM glucose at +0.55 V vs Hg/HgO to a solution of 0.1 M NaOH.



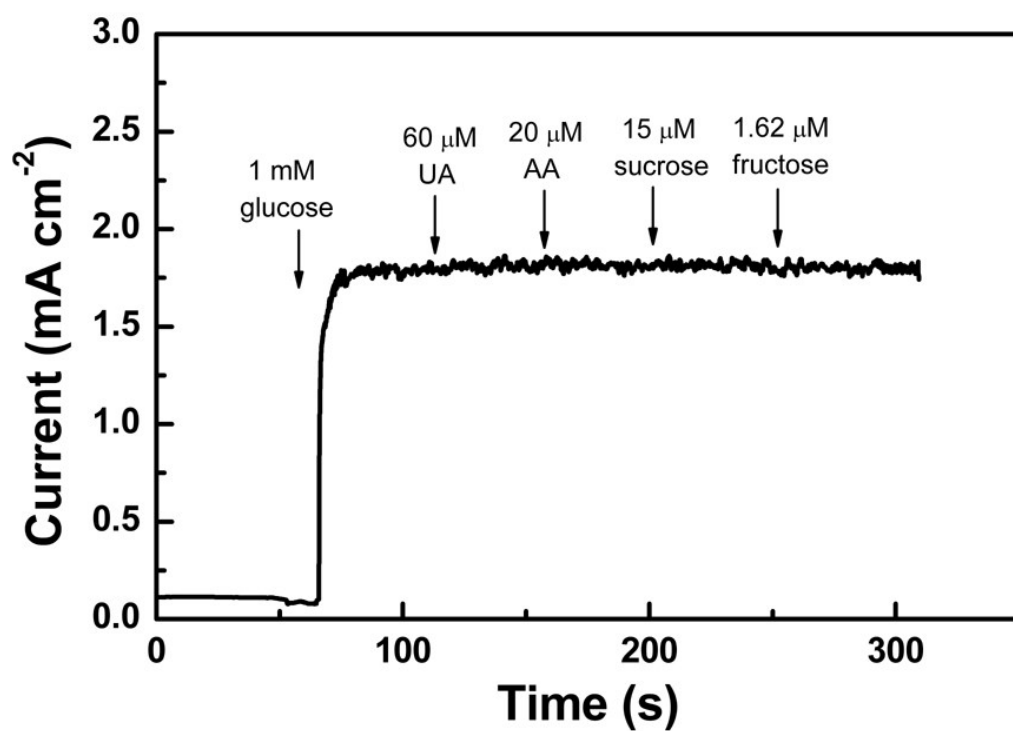

**Figure S8.** Amperometric response of YASNiCo@C catalyst coated on carbon paper after the addition of 1 mM of glucose and different concentrations of interferences at an applied potential of +0.55 V vs Hg/HgO to a solution of 0.1 M NaOH.

**Table S8.** Comparison of the sensitivity of YASNiCo@C electrode with other electrodes reported in literatures.

| Ref.                                  | Catalyst                                                    | Sensitivity<br>( $\mu\text{A cm}^{-2} \text{mM}^{-1}$ ) | linear range<br>( $\mu\text{M}$ ) | applied<br>potential (V) | limit of detection<br>( $\mu\text{M}$ ) | electrolyte       |
|---------------------------------------|-------------------------------------------------------------|---------------------------------------------------------|-----------------------------------|--------------------------|-----------------------------------------|-------------------|
| <b>Cobalt oxide</b>                   |                                                             |                                                         |                                   |                          |                                         |                   |
| S1                                    | Co <sub>3</sub> O <sub>4</sub> nanostructures               | 246.8                                                   | 0.5–1000                          | 0.54                     | 0.012                                   | 0.1 M NaOH        |
| S2                                    | Cobalt nitride (Co <sub>4</sub> N)                          | 1137.2                                                  | 600–10000                         | 0.55                     | 0.1                                     | 0.1 M NaOH        |
| S3                                    | Cobalt nitride nanosheets                                   | 921.18                                                  | 10–8000                           | 0.55                     | 0.1                                     | 0.1 M NaOH        |
| S4                                    | Mesoporous Co <sub>3</sub> O <sub>4</sub> Nanobundle        | 88                                                      | 0.6-160                           | 0.58                     | 0.6                                     | 0.1 M NaOH        |
| S5                                    | Co-CoO-Co <sub>3</sub> O <sub>4</sub> nanocomposites        | 949.3                                                   | 5-600                             | 0.55                     | 0.92                                    | 0.1 M KOH         |
| S6                                    | Cobalt oxide nanoflowers                                    | 693.02                                                  | 5-60                              | 0.60                     | 0.04                                    | 0.01M NaOH        |
| S7                                    | 3D/Co <sub>3</sub> O <sub>4</sub> thorn-like nanostructures | 180                                                     | 1-1000                            | 0.55                     | 0.046                                   | 0.1 M NaOH        |
| S8                                    | 3D hierarchical porous Co <sub>3</sub> O <sub>4</sub> film  | 366.03                                                  | 1-500                             | 0.60                     | 1                                       | 0.1 M NaOH        |
| S9                                    | Porous CoOOH nanosheet                                      | 526.8                                                   | 3-1109                            | 0.52                     | 1.37                                    | 0.1 M NaOH        |
| S10                                   | Nanoporous cobalt oxide nanowires                           | 300.8                                                   | 5-570                             | 0.60                     | 5                                       | 0.3 M NaOH        |
| S11                                   | Co <sub>3</sub> O <sub>4</sub> nanoparticles                | 471.5                                                   | 1-300                             | 0.59                     | 0.1                                     | 0.1 M NaOH        |
| S12                                   | CoNPs/ITO                                                   | 1720                                                    | 5-180                             | 0.59                     | 0.25                                    | 1 M NaOH          |
| <b>Nickel oxide</b>                   |                                                             |                                                         |                                   |                          |                                         |                   |
| S13                                   | Sandpaper-supported nickel coatings                         | 1163.3                                                  | 10-4300                           | 0.60                     | 0.25                                    | 0.1 M NaOH        |
| S14                                   | Ni layers modifie d boron-dope d diamon                     | 839.3                                                   | 10-5640                           | 0.40                     | 1.23                                    | 1 M NaOH          |
| S15                                   | Nanostructured NiO electrode                                | 206.9                                                   | 100-10000                         | 0.55                     | 1.16                                    | 0.5 M NaOH        |
| S16                                   | Ni(OH) <sub>2</sub> /PGE                                    | 948                                                     | 4-3500                            | 0.57                     | 2                                       | 0.1 M NaOH        |
| S17                                   | Nf-Ni(OH) <sub>2</sub> @oPPyNW                              | 1049.2                                                  | 1-4863                            | 0.54                     | 0.3                                     | 0.1 M NaOH        |
| S18                                   | NiO nanostructures                                          | 1915                                                    | 100-5000                          | 0.48                     | 0.7                                     | 0.1 M NaOH        |
| S19                                   | Hedgehog-like NiO nanostructures                            | 1052.8                                                  | 500-4500                          | 0.49                     | 1.2                                     | 0.1 M NaOH        |
| S20                                   | NiO nanosheets                                              | 36.13                                                   | up to 10000                       | 0.50                     | 0.9                                     | 0.5 M NaOH        |
| S21                                   | Macro-mesoporous Ni(OH) <sub>2</sub>                        | 243                                                     | 10-8300                           | 0.50                     | 1                                       | 0.1 M NaOH        |
| <b>Cobalt-Nickel bimetallic oxide</b> |                                                             |                                                         |                                   |                          |                                         |                   |
| S22                                   | Ni-Co Layered Double Hydroxide                              | 292.84                                                  | 5-50                              | 0.55                     | 0.8                                     | 0.1 M NaOH        |
| S23                                   | NiCo <sub>2</sub> O <sub>4</sub> nanowires                  | 72.4                                                    | 0.37-2000                         | 0.44                     | 0.37                                    | 0.1 M NaOH        |
| S24                                   | NiCo <sub>2</sub> O <sub>4</sub> hollow nanospheres         | 1917                                                    | 10-300                            | 0.55                     | 0.6                                     | 0.2 M NaOH        |
| S25                                   | NiCo <sub>2</sub> O <sub>4</sub> hollow nanorods            | 1685.1                                                  | 3-1000                            | 0.60                     | 0.16                                    | 0.1 M NaOH        |
| S26                                   | Ni-Co bimetal nanowires                                     | 695                                                     | 5-10000                           | 0.45                     | 1.2                                     | 0.1 M NaOH        |
| S27                                   | NiCo-LDH                                                    | 1235                                                    | 5-1200                            | 0.50                     | 1.6                                     | 0.1 M NaOH        |
| S28                                   | Ni-Co alloy nanostructures                                  | 536.2                                                   | 1-5000                            | 0.50                     | 0.39                                    | 0.1 M NaOH        |
| <b>MOF-derived metal oxide</b>        |                                                             |                                                         |                                   |                          |                                         |                   |
| S29                                   | CuO nanorod                                                 | 1523.5                                                  | up to 1250                        | 0.60                     | 1                                       | 0.1 M NaOH        |
| S30                                   | GS@ZIF-67 hybrids                                           | 1521.1                                                  | 1-805.5                           | 0.55                     | 0.36                                    | 0.1 M NaOH        |
| S31                                   | Cu Nanospheres@Porous carbon                                | 28.67                                                   | 0.15-5620                         | 0.45                     | 0.48                                    | 0.1 M NaOH        |
| S32                                   | Cu-based structures                                         | 1255                                                    | 3.76-1400                         | 0.50                     | 3.76                                    | 0.1 M NaOH        |
| S33                                   | Co nanoparticles with porous carbon                         | 227                                                     | 100-1100                          | 0.50                     | 5.69                                    | 0.1 M NaOH        |
| S34                                   | CuO/NiO-Carbon Nanocomposite                                | 586.7                                                   | 0.1-4500                          | 0.65                     | 0.037                                   | 0.1 M NaOH        |
| S35                                   | NiCo LDH nanosheets/graphene                                | 344                                                     | 5-800                             | 0.60                     | 0.6                                     | 0.1 M NaOH        |
| <b>This</b>                           | <b>YASNiCo@C</b>                                            | <b>1964</b>                                             | <b>5-1000</b>                     | <b>0.55</b>              | <b>0.75</b>                             | <b>0.1 M NaOH</b> |

## References:

S1. J. N. Xu, F. H. Li, D. D. Wang, M. H. Nawaz, Q. B. An, D. X. Han and L. Niu, Biosensors &

- Bioelectronics, 2019, 123, 25-29.
- S2. T. T. Liu, M. A. Li and L. P. Guo, *Talanta*, 2018, 181, 154-164.
- S3. T. T. Liu, M. Li, P. Dong, Y. J. Zhang and L. P. Guo, *Sensors and Actuators B-Chemical*, 2018, 255, 1983-1994.
- S4. A. V. N. Kumar, Y. H. Li, S. L. Yin, C. J. Li, H. R. Xue, Y. Xu, X. N. Li, H. J. Wang and L. Wang, *Chem-Asian J*, 2018, 13, 2093-2100.
- S5. J. Yu, Y. H. Ni and M. H. Zhai, *Journal of Alloys and Compounds*, 2017, 723, 904-911.
- S6. S. Mondal, R. Madhuri and P. K. Sharma, *J Mater Chem C*, 2017, 5, 6497-6505.
- S7. P. Kannan, T. Maiyalagan, E. Marsili, S. Ghosh, L. H. Guo, Y. J. Huang, J. A. Rather, D. Thirupathi, J. Niedziolka-Jonsson and M. Jonsson-Niedziolka, *Analyst*, 2017, 142, 4299-4307.
- S8. S. S. Fan, M. G. Zhao, L. J. Ding, J. J. Liang, J. Chen, Y. C. Li and S. G. Chen, *Journal of Electroanalytical Chemistry*, 2016, 775, 52-57.
- S9. L. Zhang, C. L. Yang, G. Y. Zhao, J. S. Mu and Y. Wang, *Sensors and Actuators B-Chemical*, 2015, 210, 190-196.
- S10. L. Q. Kang, D. P. He, L. L. Bie and P. Jiang, *Sensors and Actuators B-Chemical*, 2015, 220, 888-894.
- S11. L. Han, D. P. Yang and A. H. Liu, *Biosensors & Bioelectronics*, 2015, 63, 145-152.
- S12. T. Wang, Y. A. Yu, H. F. Tian and J. B. Hu, *Electroanalysis*, 2014, 26, 2693-2700.
- S13. Y. M. Xu, L. Hou, H. Zhao, S. Y. Bi, L. Zhu and Y. X. Lu, *Applied Surface Science*, 2019, 463, 1028-1036.
- S14. H. Y. Long, X. Z. Liu, Y. N. Xie, N. X. Hu, Z. J. Deng, Y. L. Jiang, Q. P. Wei, Z. M. Yu and S. G. Zhang, *Journal of Electroanalytical Chemistry*, 2019, 832, 353-360.
- S15. C. Heyser, R. Schrebler and P. Grez, *Journal of Electroanalytical Chemistry*, 2019, 832, 189-195.
- S16. M. L. Chelaghmia, M. Nacef, A. M. Affoune, M. Pontie and T. Derabla, *Electroanalysis*, 2018, 30, 1117-1124.
- S17. J. Yang, M. Cho, C. Pang and Y. Lee, *Sensors and Actuators B-Chemical*, 2015, 211, 93-101.
- S18. R. A. Soomro, Z. H. Ibupoto, Sirajuddin, M. I. Abro and M. Willander, *Journal of Solid State Electrochemistry*, 2015, 19, 913-922.
- S19. R. A. Soomro, Z. H. Ibupoto, Sirajuddin, M. I. Abro and M. Willander, *Sensors and Actuators B-Chemical*, 2015, 209, 966-974.
- S20. H. Liu, X. L. Wu, B. Yang, Z. J. Li, L. C. Lei and X. W. Zhang, *Electrochimica Acta*, 2015, 174, 745-752.
- S21. Y. Fan, Z. J. Yang, X. H. Cao, P. F. Liu, S. Chen and Z. Cao, *Journal of the Electrochemical Society*, 2014, 161, B201-B206.
- S22. Y. J. Gao, Q. H. Yu, Y. T. Du, M. Yang, L. Gao, S. Q. Rao, Z. Q. Yang, Q. C. Lan and Z. J. Yang, *Journal of Electroanalytical Chemistry*, 2019, 838, 41-47.
- S22. G. Ni, J. Cheng, X. Dai, Z. H. Guo, X. Ling, T. Yu and Z. J. Sun, *Electroanalysis*, 2018, 30, 2366-2373.
- S23. Z. H. Qin, Q. P. Cheng, Y. Lu and J. F. Li, *Applied Physics a-Materials Science & Processing*, 2017, 123.
- S24. W. Huang, Y. Cao, Y. Chen, J. Peng, X. Y. Lai and J. C. Tu, *Applied Surface Science*, 2017, 396, 804-811.
- S25. J. Yang, M. Cho and Y. Lee, *Biosensors & Bioelectronics*, 2016, 75, 15-22.
- S26. K. Ramachandran, T. R. Kumar, K. J. Babu and G. G. Kumar, *Scientific Reports*, 2016, 6.
- S27. J. Chen, Q. L. Sheng, Y. Wang and J. B. Zheng, *Electroanalysis*, 2016, 28, 979-984.

- S28. M. Ranjani, Y. Sathishkumar, Y. S. Lee, D. J. Yoo, A. R. Kim and G. G. Kumar, *Rsc Advances*, 2015, 5, 57804-57814.
- S29. K. Kim, S. Kim, H. N. Lee, Y. M. Park, Y. S. Bae and H. J. Kim, *Applied Surface Science*, 2019, 479, 720-726.
- S30. X. R. Chen, D. Lau, G. J. Cao, Y. Tang and C. Wu, *Acs Appl Mater Inter*, 2019, 11, 9374-9384.
- S31. Y. Xie, Y. H. Song, Y. Y. Zhang, L. J. Xu, L. F. Miao, C. W. Peng and L. Wang, *Journal of Alloys and Compounds*, 2018, 757, 105-111.
- S32. L. B. Shi, X. H. Niu, H. L. Zhao and M. B. Lan, *Chemelectrochem*, 2017, 4, 246-251.
- S33. L. B. Shi, Y. F. Li, X. Cai, H. L. Zhao and M. B. Lan, *Journal of Electroanalytical Chemistry*, 2017, 799, 512-518.
- S34. V. Archana, Y. Xia, R. Y. Fang and G. G. Kumar, *Acs Sustain Chem Eng*, 2019, 7, 6707-6719.
- S35. E. Asadian, S. Shahrokhian and A. I. Zad, *Journal of Electroanalytical Chemistry*, 2018, 808, 114-123.
